# Supplementary material
Source: publisher figshare collection journal article supplement (https://acs.figshare.com/ndownloader/files/13650647)
Supplement: Supplementary file 1 [file 13650647]

## Supporting Information

# Thickness-Encoded Micropatterns in One-Component Thermoresponsive Polymer Brushes for Culture and Triggered Release of Pancreatic Tumor Cell Monolayers and Spheroids

*Siyu Jiang, Beier Lyu,<sup>†</sup> Mareike Müller, Daniel Wesner, and Holger Schönherr\**

University of Siegen, Department of Chemistry and Biology & Research Center of Micro and Nanochemistry and Engineering (Cμ), Physical Chemistry I, Adolf-Reichwein-Str. 2, 57076

Siegen, Germany

<sup>†</sup> Present address: IQVIA, No.112 Yuehua Rd, Guangzhou, 510030, China

\*E-mail: schoenherr@chemie.uni-siegen.de

## Table of contents

**Figure S1.** SEM images of micropatterned PDEGMA on gold substrates with different geometries. (Page S-4)

**Figure S2.** (a) AFM height image of a border region on the PDEGMA micropattern with ellipsometric dry thicknesses of 5 nm and 33 nm. (b) Imaging SPR data for PDEGMA micropattern with ellipsometric dry thicknesses of 7 nm-12 nm. (Page S-4)

**Figure S3.** FTIR spectra of PDEGMA on gold substrates with different dry ellipsometric thickness. (Page S-5)

**Figure S4.** XPS survey spectra of PDEGMA on gold substrates with different dry ellipsometric thickness. (Page S-5)

**Figure S5.** Fluorescence microscopy images of PaTu 8988t cell viability test via live-dead staining assay on TCPS and 5nm PDEGMA. (Page S-6)

**Figure S6.** Light microscopy image of PaTu 8988t cells on FN-coated PDEGMA patterns. (Page S-6)

**Figure S7.** Fluorescence microscopy images of immunostained PaTu 8988t cells on PDEGMA patterns with different geometries. (Page S-7)

**Figure S8.** SEM images of PaTu 8988t cells on PDEGMA patterns at 37°C and 22°C. (Page S-8)

**Figure S9.** Light microscopy images of PaTu 8988t cell aggregates formation on PDEGMA micropatterns with circular and triangular geometries after 3 days cultivation. (Page S-8)

**Figure S10.** Light microscopy images of PaTu 8988t cell aggregates reseed on TCPS after 5 min and after 24 h at 37°C. (Page S-9)

**Video S1.** Time-lapse video [3 hours; 3 fps] of PatuT cell migration on square PDEGMA micropatterns (adhesive area: 2500  $\mu\text{m}^2$ ).

**Video S2.** Time-lapse video [3 hours; 3 fps] of PatuT cell migration on circular PDEGMA micropatterns (adhesive area: 2500  $\mu\text{m}^2$ ).

**Video S3.** Time-lapse video [3 hours; 3 fps] of PatuT cell migration on triangular PDEGMA micropatterns (adhesive area: 2500  $\mu\text{m}^2$ ).

**Video S4.** Time-lapse video [30 min; 3 fps] of PatuT cell morphology changes on square PDEGMA micropatterns (adhesive area: 2500  $\mu\text{m}^2$ ).

**Video S5.** Time-lapse video [90 min; 3 fps] of attachment of reseeded cell aggregates on tissue culture polystyrene.

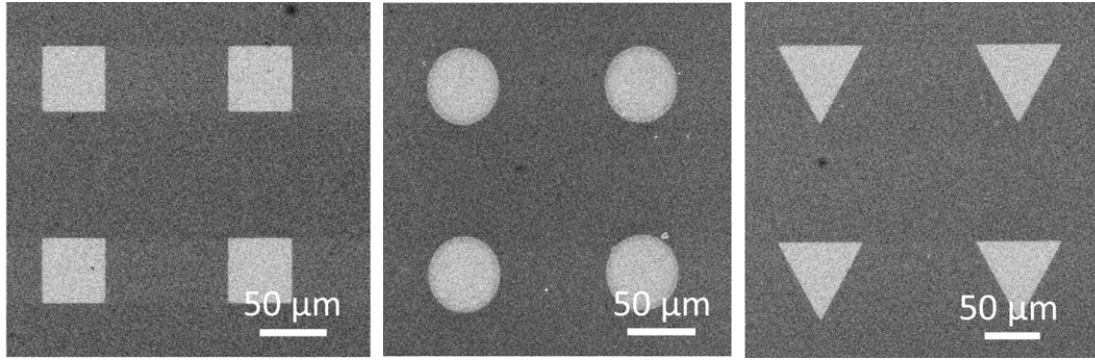

**Figure S1.** SEM images of micropatterned PDEGMA on gold substrates with different dry ellipsometric thickness (bright gray:  $5 \pm 1$  nm, dark gray:  $40 \pm 4$  nm).

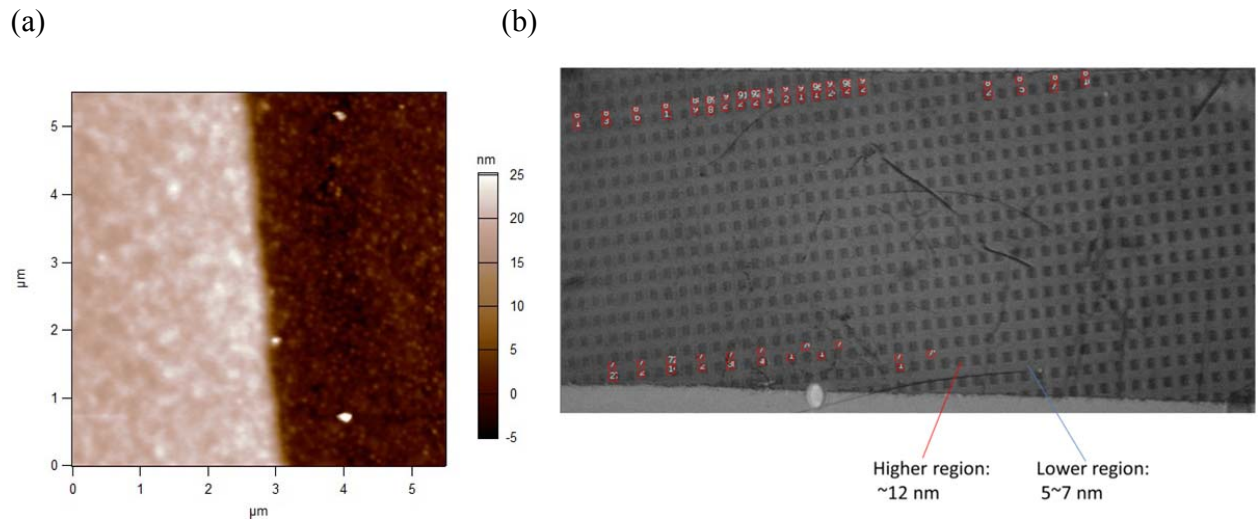

**Figure S2.** (a) AFM height image of a border region on the PDEGMA micropattern with ellipsometric dry thicknesses of 5 nm and 33 nm. (b) Imaging SPR data for PDEGMA micropattern with ellipsometric dry thicknesses of 7 nm-12 nm.

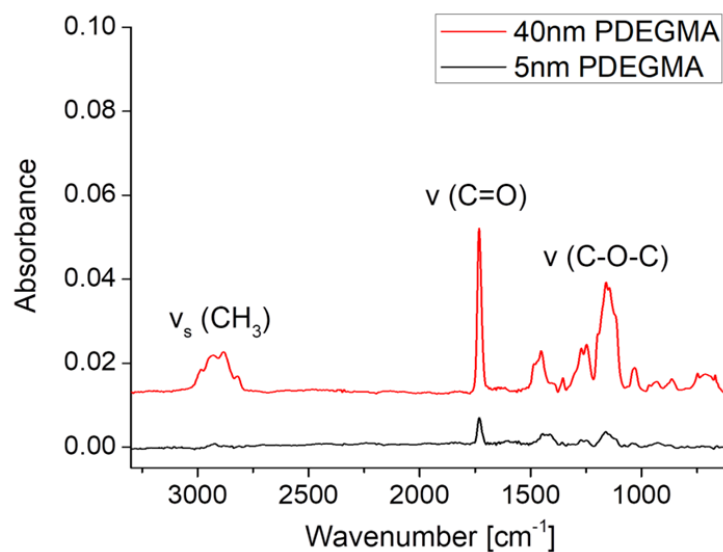

**Figure S3.** Grazing angle FTIR spectra of PDEGMA on gold substrates with different dry ellipsometric thickness.

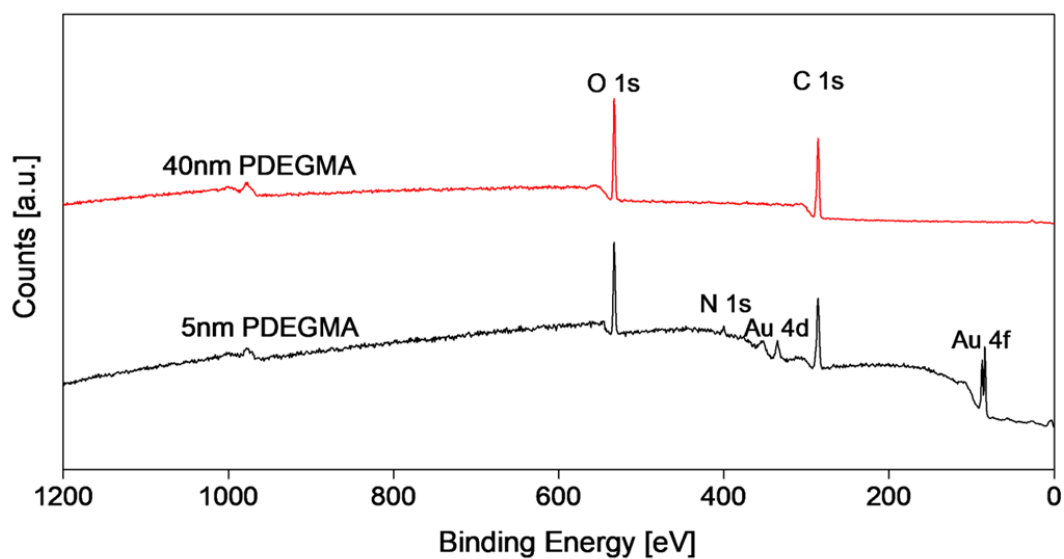

**Figure S4.** XPS survey spectra of cell culture medium adsorption on two PDEGMA films with an ellipsometric thickness of 5 nm and 40 nm at 37°C.

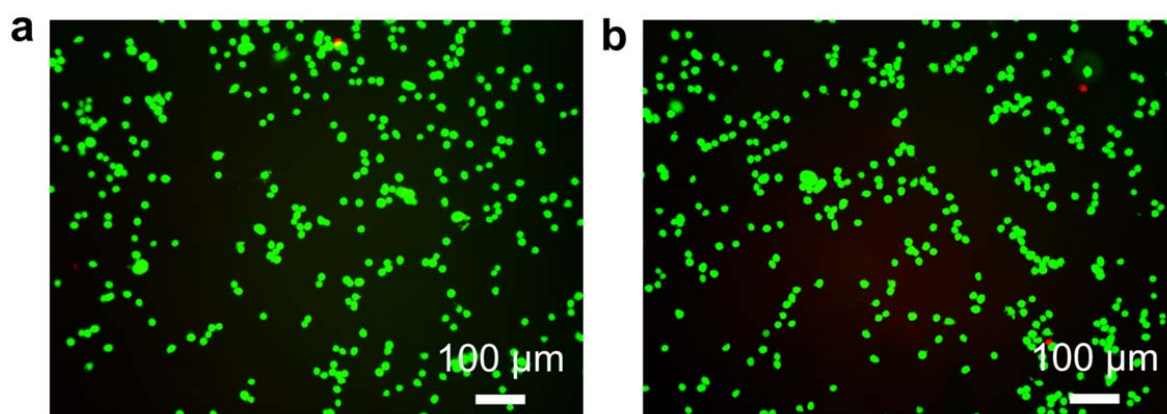

**Figure S5.** Fluorescence microscopy images of live-dead staining assay on (a) TCPS and (b) 5nm PDEGMA (viable cells: FDA, green; dead cells: PI, red).

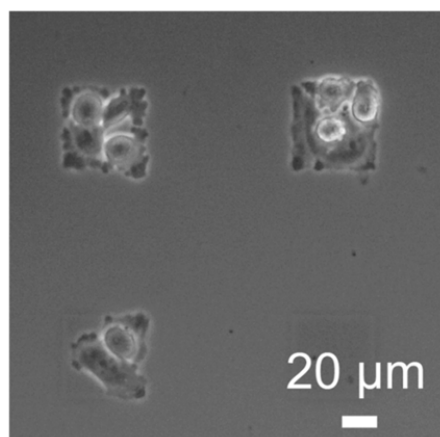

**Figure S6.** Light microscopy image of PaTu 8988t cells on FN-coated patterns after 24 h incubation at 37°C.

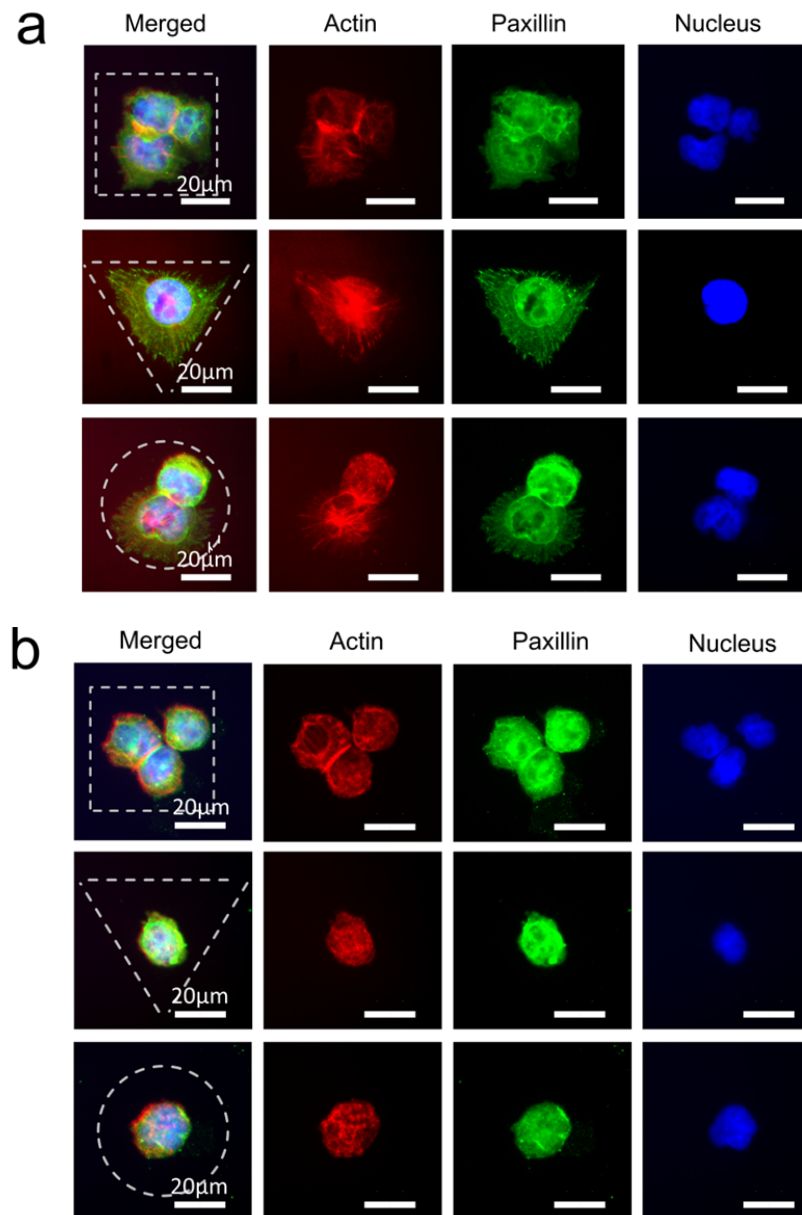

**Figure S7.** Fluorescence microscopy images of immunostained PaTu 8988t cells on PDEGMA patterns (a) at 37°C and (b) at 22°C. The cell actin cytoskeleton, focal adhesion, and nucleus were stained in red, green and blue, respectively. Scale bar of each image is 20 μm.

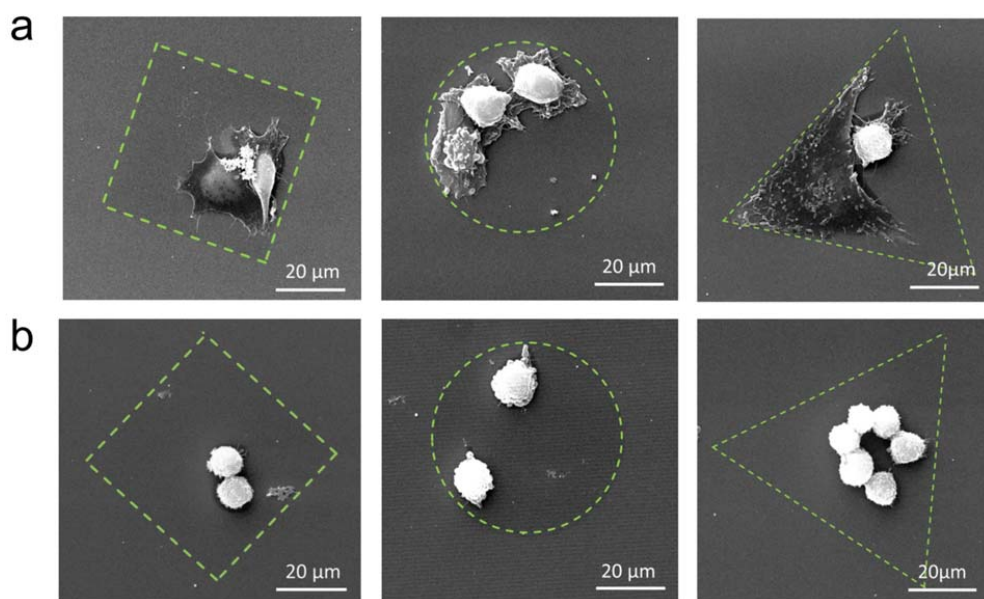

**Figure S8.** SEM images of PaTu 8988t cells on PDEGMA patterns at (a) 37°C and (b) 22°C.

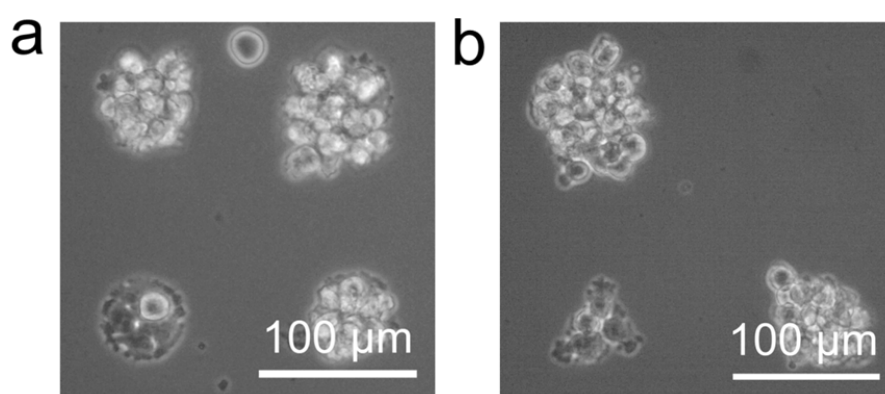

**Figure S9.** Light microscopy images of PaTu 8988t cell aggregates formation on PDEGMA micropatterns with (a) circular and (b) triangular shape after 3 days cultivation at 37°C



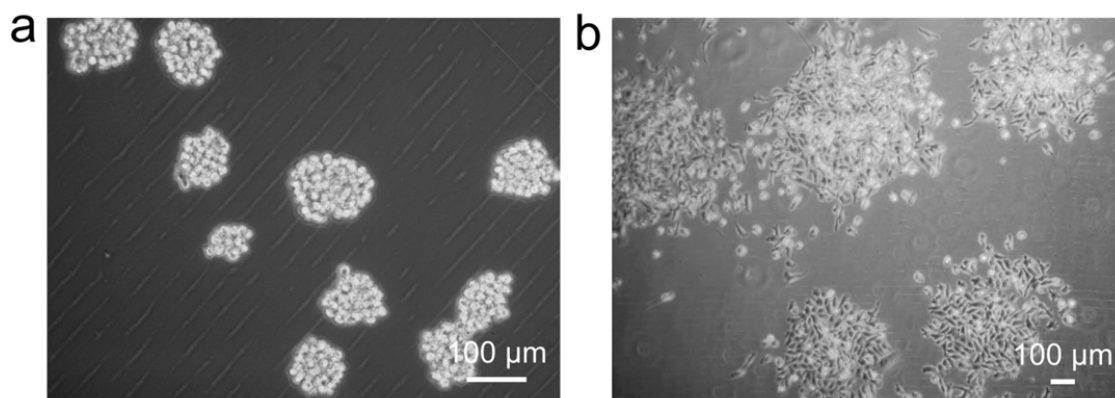

**Figure S10.** Light microscopy images of PaTu 8988t cell aggregates (a) re-seed on TCPS after 5 min and (b) after 24h at 37 °C.
